# Supplementary material for: Unraveling the environmental and anthropogenic drivers of bacterial community changes in the Estuary of Bilbao and its tributaries
Source: PLoS One. 2017 Jun 8;12(6):e0178755. doi: 10.1371/journal.pone.0178755 (PMC5464593; doi:10.1371/journal.pone.0178755)
Supplement: S1 Table — Water samples were collected monthly between August 2013—Sept. 2014 except when weather precluded it. (CSV) [file pone.0178755.s001.csv]

Water mass	Sampling date	Precipitation (mm)	Secchi (m)	Salinity (ppt)	Temperature (ºC)	DO (%)	pH	ChlA (ug/l)
IS	28.8.2013	11.20	0.65	1.73	20.20	100.30	8.07	NA
IS	27.9.2013	0.00	1.00	3.41	20.54	128.60	8.05	NA
IS	30.10.2013	11.60	0.50	2.94	14.69	99.30	8.09	NA
IS	27.11.2013	67.30	1.00	0.16	8.88	116.60	8.05	NA
IS	27.12.2013	22.70	0.20	0.32	8.62	100.80	8.33	NA
IS	6.2.2014	43.30	1.20	5.24	9.17	104.40	8.00	NA
IS	25.2.2014	16.80	3.00	0.40	9.56	106.80	8.33	NA
IS	7.4.2014	2.40	2.50	0.52	15.03	97.30	8.18	NA
IS	6.5.2014	11.90	1.50	2.41	14.89	100.20	8.22	NA
IS	4.6.2014	35.50	1.50	0.29	15.86	100.00	8.07	NA
IS	3.7.2014	15.60	0.50	0.66	18.66	99.40	8.20	NA
IS	5.8.2014	31.90	0.75	1.26	21.74	108.60	8.30	NA
IS	1.9.2014	3.10	0.75	2.17	20.87	72.70	8.16	NA
IS	30.9.2014	0.40	1.00	2.58	18.90	88.40	8.16	NA
MS	28.8.2013	11.2	1.3	11.38	21.78	NA	8.11	NA
MS	27.9.2013	0	1.75	18.03	20.91	128.3	8.06	NA
MS	30.10.2013	11.6	1	5.99	14.49	88.4	8.1	NA
MS	27.11.2013	67.3	1	1.07	9.27	116.3	8.05	NA
MS	27.12.2013	22.7	0.2	3.85	9.55	100.8	8.16	NA
MS	6.2.2014	43.3	1	1.67	8.49	106.8	8.09	NA
MS	25.2.2014	16.8	2.5	4.57	10.14	96.6	8.18	NA
MS	7.4.2014	2.4	3	3.28	15.4	96.3	8.23	NA
MS	6.5.2014	11.9	1.5	5.07	15.83	NA	8.16	NA
MS	4.6.2014	35.5	1.25	3.28	16.29	99.8	8.12	NA
MS	3.7.2014	15.6	1.5	32.77	19.36	84.2	7.96	NA
MS	5.8.2014	31.9	1.25	12.84	23.04	132	8.21	NA
MS	1.9.2014	3.1	2	23.22	22.02	85.2	7.89	NA
MS	30.9.2014	0.4	2.25	21.28	19.74	75.9	7.9	NA
OS	28.8.2013	11.2	3.5	32.17	20.18	NA	8.15	NA
OS	27.9.2013	0	5	34.37	18.63	202	8.05	NA
OS	30.10.2013	11.6	2	32.44	16.72	103.2	8.12	NA
OS	27.11.2013	67.3	1.5	7.37	10.53	111.4	8.11	NA
OS	27.12.2013	22.7	1.5	25.16	11.45	113	8.12	NA
OS	7.4.2014	2.4	9.5	26.93	13.94	104.7	7.65	NA
OS	6.5.2014	11.9	5	33.88	14.85	NA	7.99	NA
OS	4.6.2014	35.5	4.5	33.51	15.76	121.5	8.03	NA
OS	3.7.2014	15.6	6	32.46	19.06	104.9	8.06	NA
OS	5.8.2014	31.9	5.5	32.84	22.19	123.8	8.2	NA
OS	1.9.2014	3.1	5	33.38	20.55	97.1	7.89	NA
OS	30.9.2014	0.4	4.5	34.51	18.36	98.5	8.07	NA
B30	28.8.2013	11.2	0.65	30.05	20.96	NA	8.03	3.827
B30	27.9.2013	0	1	30.29	20.03	79.3	8.09	1.246
B30	30.10.2013	11.6	0.5	30.18	17.28	52.1	8	0.771
B30	27.11.2013	67.3	1	30.26	14.89	51.2	7.97	0.26
B30	27.12.2013	22.7	0.2	30.31	12.14	66.8	8.03	0.579
B30	6.2.2014	43.3	1	30.06	11.44	90.9	7.86	0.408
B30	25.2.2014	16.8	3	30.14	11.7	65	8.05	0.267
B30	7.4.2014	2.4	2.5	29.88	12.88	65.4	7.75	1.081
B30	6.5.2014	11.9	1.5	29.33	15	NA	7.85	1.204
B30	4.6.2014	35.5	1.5	29.42	16.05	46.1	7.74	1.283
B30	3.7.2014	15.6	0.5	29.24	19.93	6	7.65	5.696
B30	5.8.2014	31.9	0.75	29.54	22.37	8.3	7.72	18.729
B30	1.9.2014	3.1	0.75	29.88	21.95	15.1	7.7	1.754
B30	30.9.2014	0.4	1	30.12	19.22	29.1	7.78	2.907
B33	28.8.2013	11.2	1.3	33.01	20.4	NA	8.11	1.202
B33	27.9.2013	0	1.75	33.13	19.7	107	8.11	4.48
B33	30.10.2013	11.6	1	33.02	17.2	107	8.03	0.801
B33	27.11.2013	67.3	1	33.09	15.87	73.2	8.09	0.471
B33	27.12.2013	22.7	0.2	32.98	12.54	87.4	8.15	0.519
B33	6.2.2014	43.3	1.2	33.1	11.79	96.4	7.89	0.381
B33	25.2.2014	16.8	2.5	32.62	11.94	77.8	8.04	0.723
B33	7.4.2014	2.4	3	33.06	13.02	88.1	7.93	1.047
B33	6.5.2014	11.9	1.5	32.34	14.78	NA	7.93	2.775
B33	4.6.2014	35.5	1.25	32.92	15.62	88.2	7.91	2.197
B33	3.7.2014	15.6	1.5	32.77	19.36	84.2	7.96	1.809
B33	5.8.2014	31.9	1.25	32.96	22.11	80.3	8.01	5.607
B33	1.9.2014	3.1	2	32.86	20.92	83.5	8.01	2.379
B33	30.9.2014	0.4	2.25	33.16	18.67	83.2	7.98	1.359
B35	28.8.2013	11.2	3.5	34.99	20.41	NA	8.16	0.47
B35	27.9.2013	0	5	34.93	18.65	104.8	8.13	2.025
B35	30.10.2013	11.6	2	35.03	17.33	107.4	8.12	0.285
B35	27.11.2013	67.3	1.5	34.93	16.24	96.9	8.13	0.104
B35	27.12.2013	22.7	1.5	34.99	12.65	104	8.22	0.356
B35	7.4.2014	2.4	9.5	34.01	13.34	104	7.8	0.549
B35	6.5.2014	11.9	5	34.95	14.34	NA	8.06	3.204
B35	4.6.2014	35.5	4.5	34.78	15.38	104	8.05	4.383
B35	3.7.2014	15.6	6	34.89	18.78	112	8.1	1.012
B35	5.8.2014	31.9	5.5	34.4	22.04	105.2	8.11	5.177
B35	1.9.2014	3.1	5	34.58	20.22	107.9	8.13	0.827
B35	30.9.2014	0.4	4.5	34.91	18.39	102.2	8.09	0.964
